# Supplementary material for: Enhanced adsorptive desulfurization by iso-structural amino bearing IRMOF-3 and IRMOF-3@Al2O3versus MOF-5 and MOF-5@Al2O3 revealing the predominant role of hydrogen bonding
Source: Royal Society of Chemistry journal article supplement (doi:10.1039/c9dt02674f), 2019-01-01
Supplement: c9dt02674f1.pdf [file c9dt02674f1.pdf]

## Enhanced adsorptive desulfurization by iso-structural amino bearing IRMOF-3 and IRMOF-3@Al<sub>2</sub>O<sub>3</sub> versus MOF-5 and MOF-5@Al<sub>2</sub>O<sub>3</sub> revealing the predominant role of hydrogen bonding

Zareen Zuhra<sup>1</sup>, Cuncun Mu<sup>1</sup>, Fang Tang, Yunshan Zhou\*, Lijuan Zhang\*, Zipeng Zhao and Libo Qin

State Key Laboratory of Chemical Resource Engineering, Institute of Science, Beijing University of Chemical Technology, Beijing 100029, P. R. China

### 1. Experimental

#### 1.1. Materials

$\gamma$ -Al<sub>2</sub>O<sub>3</sub> beads ( $S_{\text{BET}}$ , 192.08 m<sup>2</sup> g<sup>-1</sup>;  $V_{\text{total}}$ , 0.679 cm<sup>3</sup> g<sup>-1</sup>; average pore size, 12.06 nm; diameter, ca.2 mm) were supplied by the State Key Laboratory of Chemical Resource Engineering (Beijing University of Chemical Technology, China), and were washed with distilled water and pre-treated at 200 °C for 2 hours in muffle furnace every time before use to remove water and other contaminants. All the other chemicals were purchased from commercial sources: zinc nitrate hexahydrate (AR grade) and *N,N*-dimethyl formamide (DMF, AR grade) were from Beijing Chemical Reagent Co. Ltd.; terephthalic acid (H<sub>2</sub>BDC, 99%) was from Aladdin Reagent Co. Ltd.; 2-amion terephthalic acid was from Alfa Aesar Chemical Co. Ltd.; n-octane (AR grade) was from Tianjin Guangfu Technology Development Co. Ltd.; methanol (HPLC grade) was from Tianjin Siyou Chemicals Co. Ltd.; BT (99%), 3-MT (99%) and DBT (99%) were from J&K Scientific Ltd.; 4,6-DMDBT (99%) was from Beijing HWRK Chemicals Co. Ltd. All reagents were used as received without further purification.

#### 1.2. Apparatus for characterization

The Fourier Transform Infrared spectra (FT-IR) were tested on a Nicolet FTIR-170SX spectrometer with KBr pellets in the range of 400-4000 cm<sup>-1</sup>. Powder X-ray diffraction (XRD) was recorded on Rigaku D/max 2500 X-ray diffractometer with scanning rate of 10° min<sup>-1</sup> and scanning range from 5° to 70°, and incident beam is graphite-monochromatic Cu K<sub>α</sub> radiation ( $\lambda = 0.15405$  nm). Scanning electron microscopy (SEM) and Energy Dispersive Spectrometer (EDS) were performed on a Zeiss Supra55 scanning electron microscopy with an accelerating voltage of 20 kV. Element analysis was measured on ARL9800 X-ray fluorescence spectrometer (XRF). Mechanical strength data were collected using YHKC-2A particle strength tester. TG-DTA were tested on Netzsch STA449 thermogravimetric analyzer with heating rate of 10° min<sup>-1</sup> from 25 to 800 °C in the air.

The sulfur contents were analyzed by HPLC Agilent 1100 series with C-18 column, diameter 4.6 mm, length 250 mm, diameter of filler 5  $\mu$ m, 10% water and 90% methanol as the initial mobile phase, gradient elution to 100% methanol in 10 min with flow rate of 1.0 mL min<sup>-1</sup>.

#### 1.3. Preparation of adsorbents

##### 1.3.1 Pretreatment of $\gamma$ -Al<sub>2</sub>O<sub>3</sub> beads

The  $\gamma$ -Al<sub>2</sub>O<sub>3</sub> beads were washed three times in deionized water, placed in muffle furnace with calcination of 200 °C for 2 h after drying, getting rid of water molecules and other impurity molecules.

##### 1.3.2 Preparation of adsorbents

MOF-5 was prepared by some modifications in accordance with the literature method.<sup>S1</sup> The detailed procedures are as follows: in a 50 mL of Teflon-lined stainless-steel autoclave, 1.5 mmol of terephthalic acid and 3 mmol zinc nitrate hexahydrate were dissolved in 30 mL DMF, stirring 0.5 h, and then the mixture was heated at 120 °C for 21 h. After the autoclave cooling to room temperature, the product was separated, washed with DMF (3 × 10 mL), and immersed in chloroform for three days (3 × 10 mL), changing solution every 24 h. The material was then evacuated at 70 °C for 12 h to remove water molecules and stored in desiccator.

IRMOF-3 was prepared by some modifications in accordance with the literature method.<sup>S2</sup> The detailed procedures are as follows: in a 50 ml of Teflon-lined stainless-steel autoclave, 0.6 mmol of 2-amino terephthalic acid and 1.8 mmol zinc nitrate hexahydrate were dissolved in 30 mL DMF, stirring 0.5 h, and then the mixture was heated at 110 °C for 48 h. After the autoclave cooling to room temperature, the product was separated, washed with DMF (3 × 10 mL), and immersed in chloroform for three days (3 × 10 mL), changing solution every 24 h. The material was then evacuated at 70 °C for 12 h to remove water molecules and stored in desiccator.

The preparation methods of MOF-5@ $\gamma$ -Al<sub>2</sub>O<sub>3</sub> and IRMOF-3@ $\gamma$ -Al<sub>2</sub>O<sub>3</sub> were the same with those of the corresponding MOFs except for introduction of 1.0 g  $\gamma$ -Al<sub>2</sub>O<sub>3</sub> beads into the mixed solution of the other reactants, which had been stirred for 0.5 h previously.

#### **1.4. Adsorption desulfurization performance**

##### *1.4.1 Preparation of model oil*

A certain amount of BT, DBT, 3-MT, 4,6-DMDBT was dissolved in 20 g n-octane solution, and the initial sulfur content of model oil was 1000 ppmw<sub>S</sub>.

##### *1.4.2 Adsorption desulfurization experiments*

Prior to adsorption experiments,  $\gamma$ -Al<sub>2</sub>O<sub>3</sub> beads, MOF-5, IRMOF-3 and MOF-5@ $\gamma$ -Al<sub>2</sub>O<sub>3</sub>, IRMOF-3@ $\gamma$ -Al<sub>2</sub>O<sub>3</sub> composite materials were degassed under vacuum at 150 °C overnight to remove water and other contaminants. Treated adsorbents were added into round bottom flask with model oil in water bath at atmospheric pressure under stirring for 1 h, controlling the temperature of 20, 30, 40 and 50 °C, respectively. The liquid phase was then separated from the adsorbent by filtration and the S-content of the treated oil was determined by HPLC.

The adsorption capacity under different experimental conditions was calculated by the following formula:

$$Q_i = \frac{W}{M}(C_0 - C_i) \times 10^{-3} \quad (1)$$

Where  $Q_i$  is the adsorption capacity of sulfur adsorbed on the adsorbent (mg S·g<sup>-1</sup> MOF), W is the mass of model oil (g), M is the mass of the MOF used (g), and  $C_0$  and  $C_i$  are the initial and final S-concentrations in the model oil (μg/g), respectively.

##### *1.4.2 Adsorbents regeneration experiment*

After adsorption desulfurization experiment, adsorbents were washed in acetone using soxhlet extractor. The eluent samples were analyzed by HPLC, until peaks of sulfur-containing compounds no longer appear, showing sulfur-containing compounds removed completely. After washing, adsorbents were dried under vacuum at 100 °C for 12 h and experiments for reusing are the same with the as-synthesized samples.

## **2. Effect of time on the absorption capabilities**

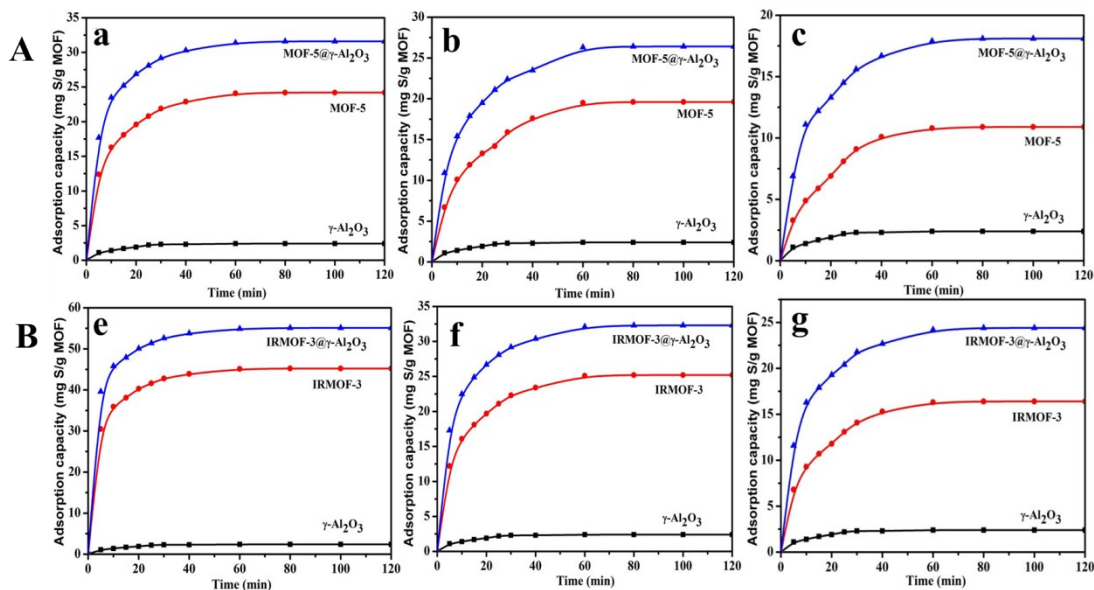

**Fig. S1** Effect of adsorption time on desulfurization capacity for DBT (a, e), 3-MT (b, f), 4,6-DMDBT (c, g) over  $\gamma$ -Al<sub>2</sub>O<sub>3</sub>, MOF-5, MOF-5@ $\gamma$ -Al<sub>2</sub>O<sub>3</sub> (A) and  $\gamma$ -Al<sub>2</sub>O<sub>3</sub>, IRMOF-3, IRMOF-3@ $\gamma$ -Al<sub>2</sub>O<sub>3</sub> (B). Conditions: model oil 20 g,  $\gamma$ -Al<sub>2</sub>O<sub>3</sub> 0.5 g, MOF-5 0.05 g, MOF-5/IRMOF-3@ $\gamma$ -Al<sub>2</sub>O<sub>3</sub> 0.5 g, [BT], [DBT], [3-MT] and [4,6-DMDBT] 1000 ppmw<sub>S</sub>, temperature 30 °C.

**Table S1.** The adsorption capacities of the obtained MOFs and composites at 10 and 60 min.<sup>a</sup>

|                               | MOF-5 | MOF-5@ $\gamma$ -Al <sub>2</sub> O <sub>3</sub> | IRMOF-3 | IRMOF-3@ $\gamma$ -Al <sub>2</sub> O <sub>3</sub> |
|-------------------------------|-------|-------------------------------------------------|---------|---------------------------------------------------|
| Adsorption capacity at 10 min |       |                                                 |         |                                                   |
| BT                            | 21.1  | 30.6                                            | 32.1    | 40.8                                              |
| DBT                           | 16.3  | 23.5                                            | 35.9    | 45.8                                              |
| 3-MT                          | 10.1  | 19.5                                            | 16.1    | 22.5                                              |
| DMDBT                         | 4.9   | 11.1                                            | 9.3     | 16.3                                              |
| Adsorption capacity at 60 min |       |                                                 |         |                                                   |
| DBT                           | 24.1  | 31.4                                            | 45.1    | 54.9                                              |
| 3-MT                          | 15.4  | 26.3                                            | 25.1    | 32.1                                              |
| DMDBT                         | 10.8  | 17.9                                            | 16.3    | 24.2                                              |
| BT                            | 31.9  | 40.7                                            | 41.7    | 50.6                                              |

<sup>a</sup>Reaction conditions: model oil 20 g,  $\gamma$ -Al<sub>2</sub>O<sub>3</sub> 0.5 g, MOF-5 0.05 g, MOF-5/IRMOF-3@ $\gamma$ -Al<sub>2</sub>O<sub>3</sub> 0.5 g, [BT], [DBT], [3-MT] and [4,6-DMDBT] 1000 ppmw<sub>S</sub>, temperature 30 °C.

### 3. Effect of temperature on the absorption capabilities

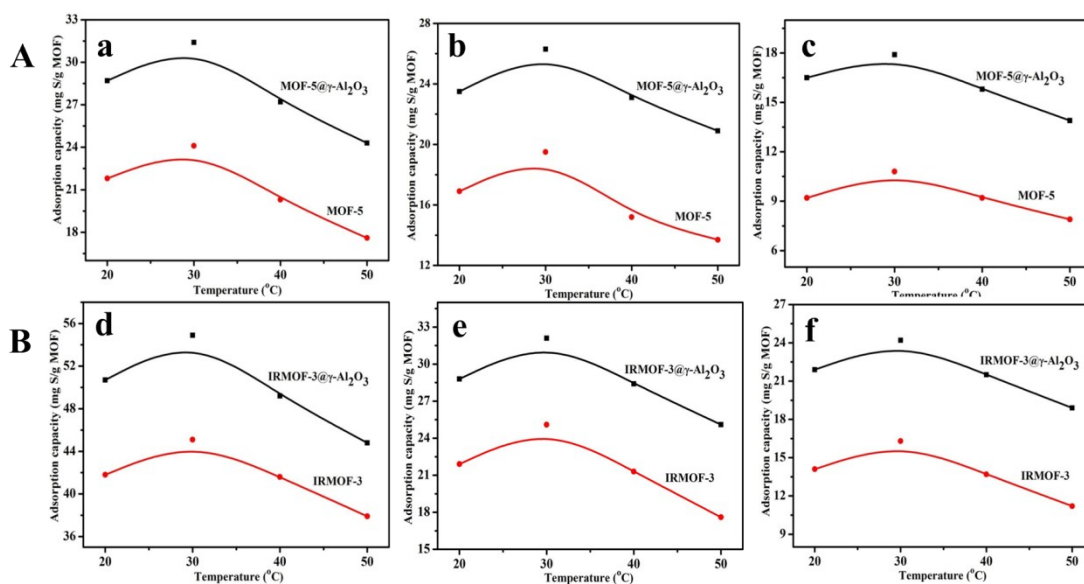

**Fig. S2** Effect of adsorption temperature on desulfurization capacity for DBT (a, d), 3-MT (b, e), 4,6-DMDBT (c, f) over  $\gamma$ -Al<sub>2</sub>O<sub>3</sub>, MOF-5, MOF-5@ $\gamma$ -Al<sub>2</sub>O<sub>3</sub> (A) and  $\gamma$ -Al<sub>2</sub>O<sub>3</sub>, IRMOF-3, IRMOF-3@ $\gamma$ -Al<sub>2</sub>O<sub>3</sub> (B). Conditions: model oil 20 g,  $\gamma$ -Al<sub>2</sub>O<sub>3</sub> 0.5 g, MOF-5 0.05 g, MOF-5/IRMOF-3@ $\gamma$ -Al<sub>2</sub>O<sub>3</sub> 0.5 g, [BT], [DBT], [3-MT] and [4,6-DMDBT] 1000 ppm<sub>w</sub>, time 60 min.

**Table S2.** The adsorption capacities of the obtained MOFs and composites at 30 °C.<sup>a</sup>

|       | MOF-5 | MOF-5@ $\gamma$ -Al <sub>2</sub> O <sub>3</sub> | IRMOF-3 | IRMOF-3@ $\gamma$ -Al <sub>2</sub> O <sub>3</sub> |
|-------|-------|-------------------------------------------------|---------|---------------------------------------------------|
| BT    | 32.0  | 40.8                                            | 41.6    | 50.7                                              |
| DBT   | 24.1  | 31.5                                            | 45.2    | 54.9                                              |
| 3-MT  | 19.6  | 26.3                                            | 25.2    | 32.0                                              |
| DMDBT | 10.8  | 18.0                                            | 16.4    | 24.2                                              |

<sup>a</sup>Reaction conditions: model oil 20 g,  $\gamma$ -Al<sub>2</sub>O<sub>3</sub> 0.5 g, MOF-5 0.05 g, MOF-5/IRMOF-3@ $\gamma$ -Al<sub>2</sub>O<sub>3</sub> 0.5 g, [BT], [DBT], [3-MT] and [4,6-DMDBT] 1000 ppm<sub>w</sub>, time 60 min.

#### 4. Effect of mass ratio between oil and adsorbent on absorption capabilities

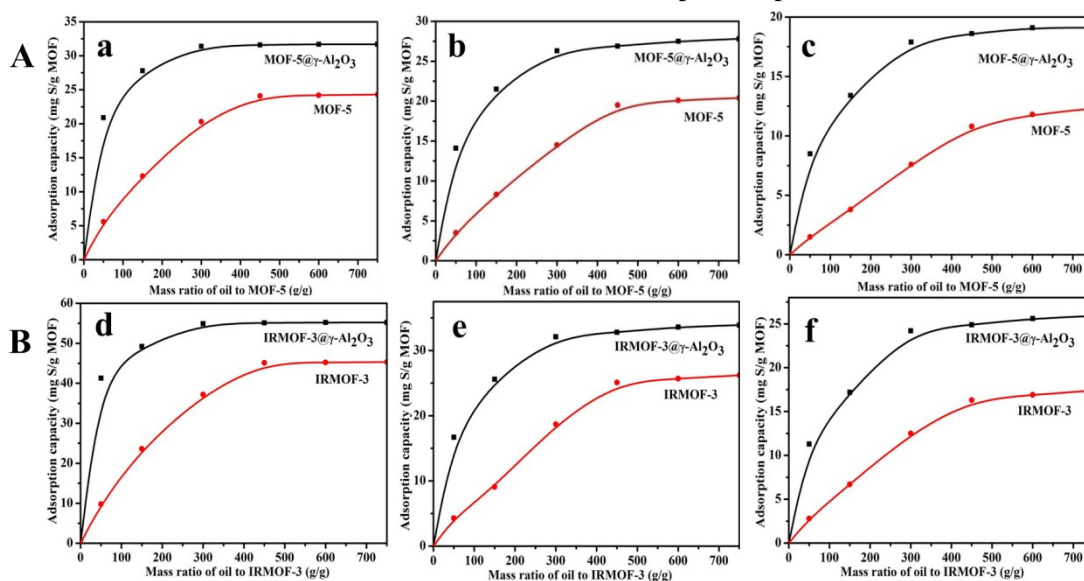

**Fig. S3** Effect of mass ratio between oil and adsorbent on desulfurization capacity for DBT (a, d),

3-MT (b, e), 4,6-DMDBT (c, f) over MOF-5, MOF-5@ $\gamma$ -Al<sub>2</sub>O<sub>3</sub> (A) and IRMOF-3, IRMOF-3@ $\gamma$ -Al<sub>2</sub>O<sub>3</sub> (B). Conditions: model oil 20 g, [BT], [DBT], [3-MT] and [4,6-DMDBT] 1000 ppm<sub>S</sub>, temperature 30 °C, time 60 min.

### 5. Reusability of the adsorbents

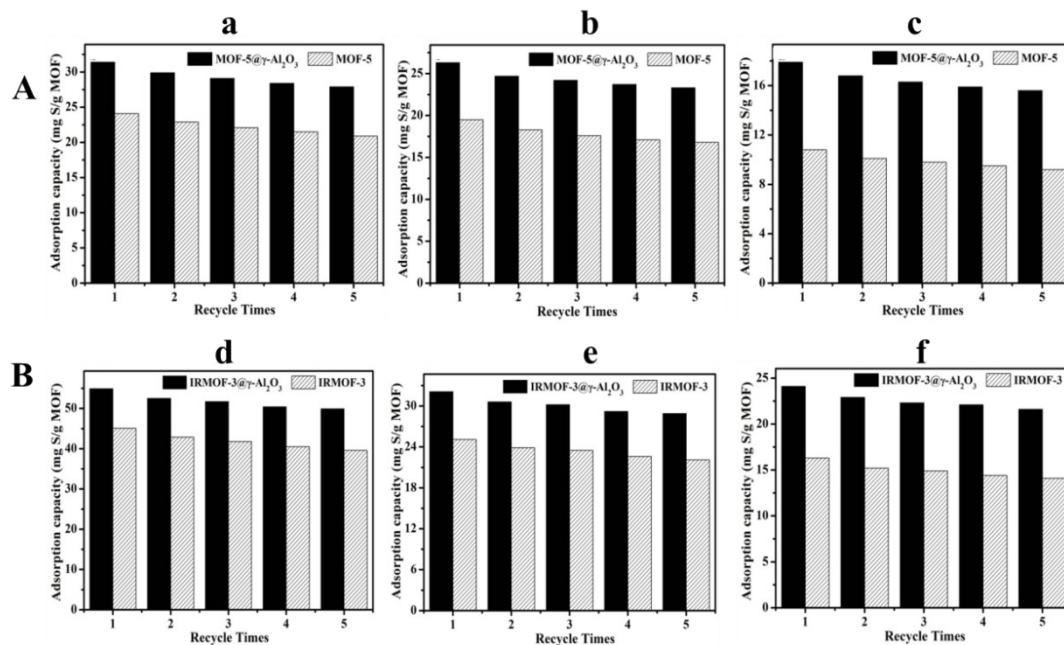

**Fig. S4** Effect of recycle times of MOF-5, MOF-5@ $\gamma$ -Al<sub>2</sub>O<sub>3</sub> (A) and IRMOF-3 and IRMOF-3@ $\gamma$ -Al<sub>2</sub>O<sub>3</sub> (B) on sulfur adsorption capacities for DBT (a), 3-MT (b), DMDBT (c). Conditions: model oil 20g, the mass ratio  $M_{\text{MOF-5@}\gamma\text{-Al}_2\text{O}_3}/M_{\text{oil}}$  1:40, [BT]、[DBT]、[3-MT]、[4,6-DMDBT] 1000ppm<sub>S</sub>, time 60 min, temperature 30 °C.

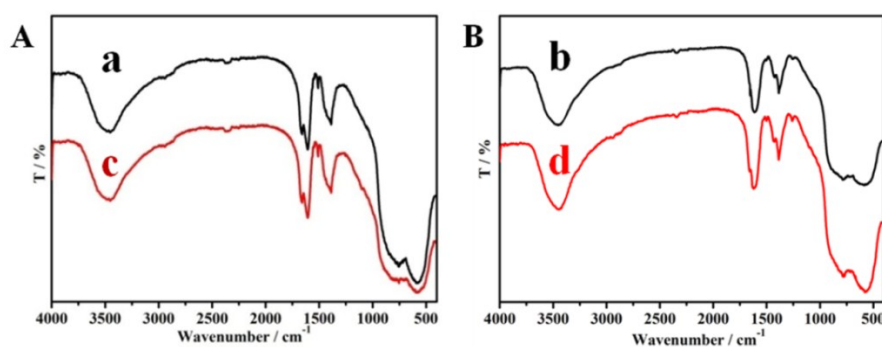

**Fig. S5** FT-IR spectra of the fresh (a, b) and fifth regenerated (c, d) of MOF-5@ $\gamma$ -Al<sub>2</sub>O<sub>3</sub> (A) and IRMOF-3@ $\gamma$ -Al<sub>2</sub>O<sub>3</sub> (B) for BT.

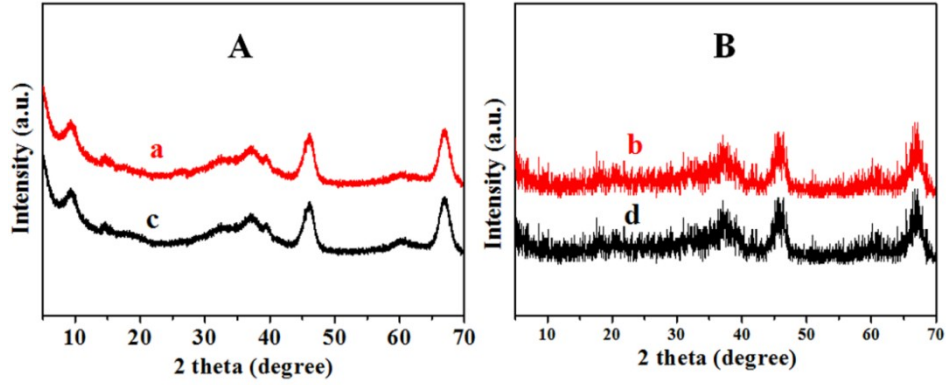

**Fig. S6** XRD spectra of the fresh (a, b) and fifth regenerated (c, d) of MOF-5@ $\gamma$ -Al<sub>2</sub>O<sub>3</sub> (A) and IRMOF-3@ $\gamma$ -Al<sub>2</sub>O<sub>3</sub> (B) for BT.

## 6. Kinetic analysis

Kinetic constant was calculated by second-order kinetic equations as follows:<sup>S3, S4</sup>

$$\frac{t}{q_t} = \frac{1}{k_2 q_e^2} + \frac{1}{q_e} t \quad (2)$$

where  $q_e$  is equilibrium adsorption capacity (mg S/g MOF),  $q_t$  is adsorption capacity at time  $t$  (mg S/g MOF),  $k_2$  is second-order kinetic equilibrium constant.

### The pseudo-second order kinetics of BT adsorption over the MOFs

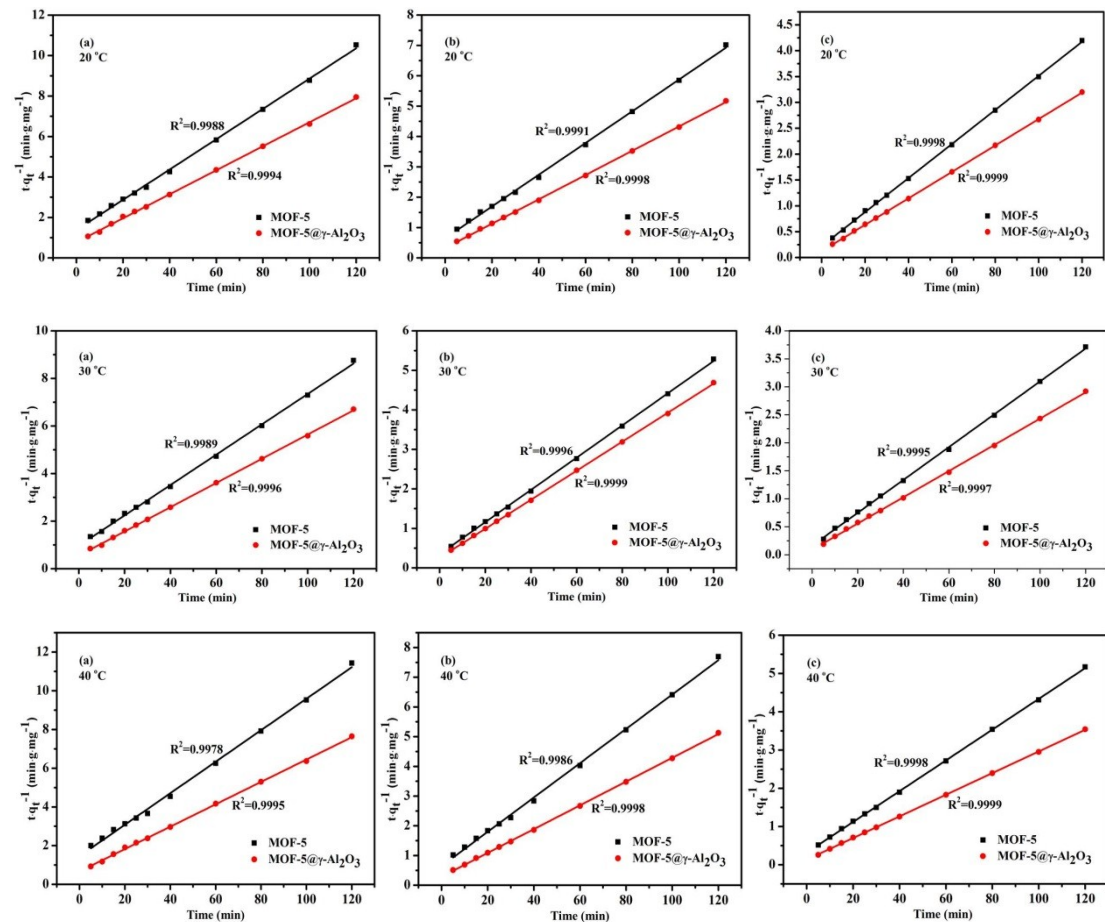

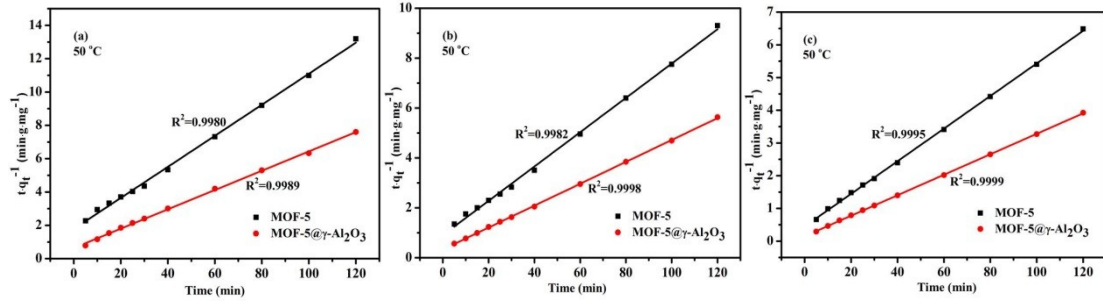

**Fig. S7** Plots of pseudo-second order kinetics of BT adsorption over MOF-5 and MOF-5@ $\gamma$ -Al<sub>2</sub>O<sub>3</sub> at different temperature:  $C_0 = 250$  (a),  $500$  (b) and  $1000$  (c) ppmw<sub>S</sub>.

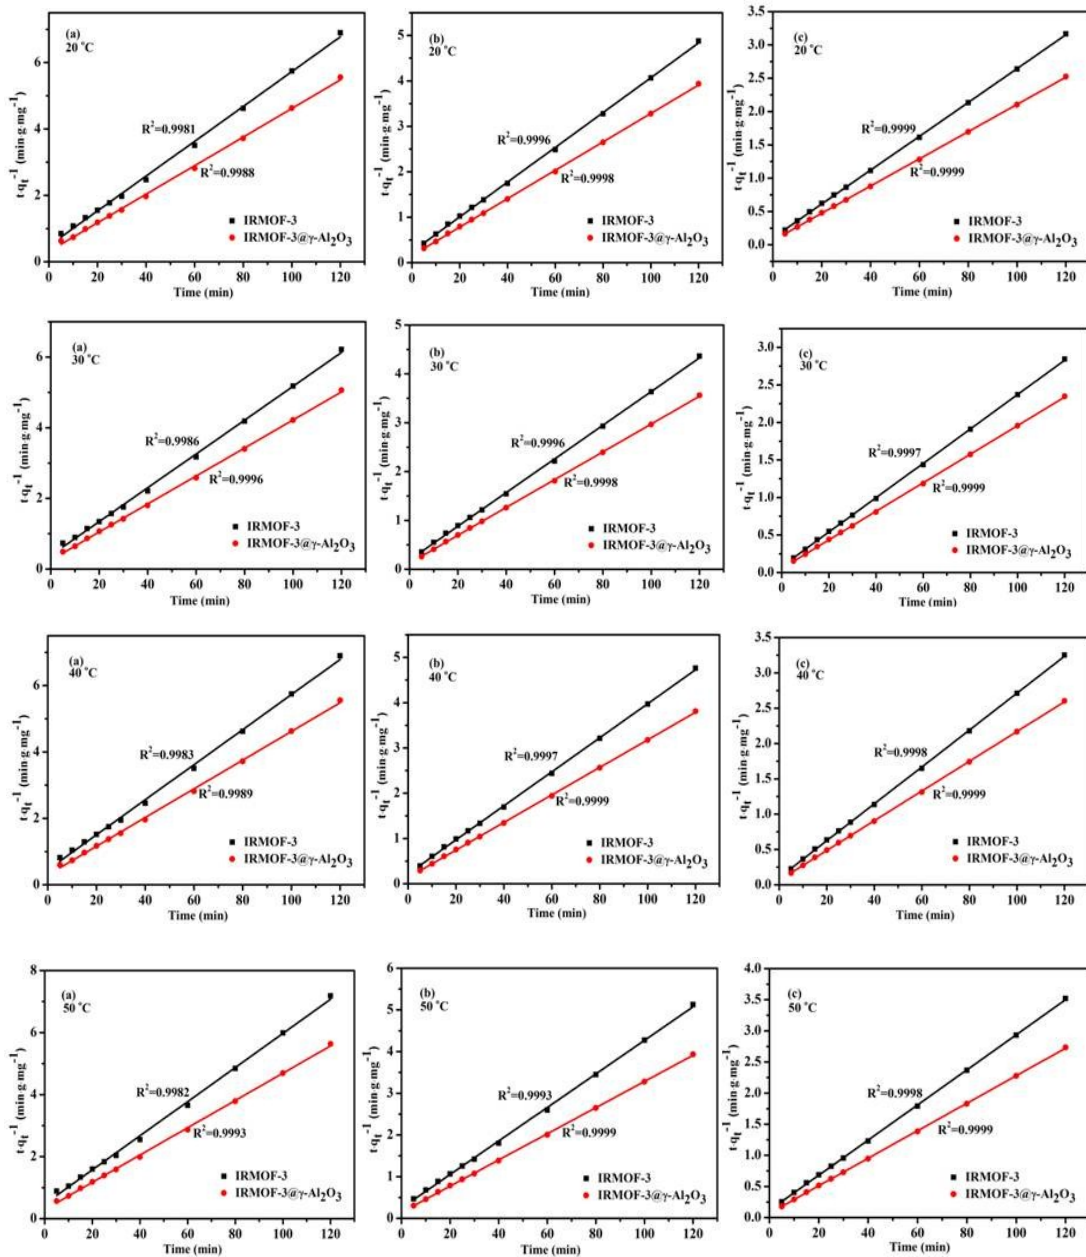

**Fig. S8** Plots of pseudo-second order kinetics of BT adsorption over IRMOF-3 and IRMOF-3@ $\gamma$ -Al<sub>2</sub>O<sub>3</sub> at different temperature:  $C_0 = 250$  (a),  $500$  (b) and  $1000$  (c) ppmw<sub>S</sub>.

**Table S3.** The pseudo-second-order kinetic constants ( $k_2$ ) of MOF-5, MOF-5@ $\gamma$ -Al<sub>2</sub>O<sub>3</sub> and IRMOF-3, IRMOF-3@ $\gamma$ -Al<sub>2</sub>O<sub>3</sub> at various DBT concentrations and different temperatures. The maximum adsorption capacities ( $Q_0$ ) and the molar ratios of DBT that adsorbed on each metal ion are also presented.

| Adsorbent                                                          | T/°C | $k_2/10^{-3} \text{ g min}^{-1} \text{ mg}^{-1}$ |                       |                        | $Q_0/\text{mg S g}^{-1}$<br>MOF | DBT/metal<br>(mol/mol) |
|--------------------------------------------------------------------|------|--------------------------------------------------|-----------------------|------------------------|---------------------------------|------------------------|
|                                                                    |      | 250 ppmw <sub>S</sub>                            | 500 ppmw <sub>S</sub> | 1000 ppmw <sub>S</sub> |                                 |                        |
| MOF-5@<br>$\gamma$ -Al <sub>2</sub> O <sub>3</sub><br>(MOF-5)      | 20   | 5.07 (4.82)                                      | 5.45 (5.05)           | 5.62 (5.36)            | 47.68 (35.97)                   | 0.29 (0.22)            |
|                                                                    | 30   | 5.27 (4.94)                                      | 5.59 (5.11)           | 5.81 (5.65)            | 50.68 (39.21)                   | 0.31 (0.24)            |
|                                                                    | 40   | 5.54 (5.19)                                      | 5.84 (5.26)           | 6.13 (5.86)            | 42.73 (32.28)                   | 0.26 (0.19)            |
|                                                                    | 50   | 5.71 (5.36)                                      | 6.11 (5.51)           | 6.39 (5.97)            | 37.57 (27.31)                   | 0.23 (0.16)            |
| IRMOF-3<br>@ $\gamma$ -Al <sub>2</sub> O <sub>3</sub><br>(IRMOF-3) | 20   | 6.12 (5.89)                                      | 6.47 (6.23)           | 6.71 (6.50)            | 82.64 (68.49)                   | 0.53 (0.44)            |
|                                                                    | 30   | 6.33 (6.07)                                      | 6.57 (6.35)           | 6.91 (6.68)            | 86.58 (72.25)                   | 0.56 (0.46)            |
|                                                                    | 40   | 6.54 (6.39)                                      | 6.79 (6.69)           | 7.19 (7.04)            | 74.02 (64.59)                   | 0.47 (0.41)            |
|                                                                    | 50   | 6.87 (6.64)                                      | 6.97 (6.86)           | 7.29 (7.12)            | 65.74 (57.21)                   | 0.42 (0.37)            |

**Table S4.** The pseudo-second-order kinetic constants ( $k_2$ ) of MOF-5, MOF-5@ $\gamma$ -Al<sub>2</sub>O<sub>3</sub> and IRMOF-3, IRMOF-3@ $\gamma$ -Al<sub>2</sub>O<sub>3</sub> at various 3-MT concentrations and different temperatures. The maximum adsorption capacities ( $Q_0$ ) and the molar ratios of 3-MT that adsorbed on each metal ion are also presented.

| Adsorbent                                                          | T/°C | $k_2/10^{-3} \text{ g min}^{-1} \text{ mg}^{-1}$ |                       |                        | $Q_0/\text{mg S g}^{-1}$<br>MOF | 3-MT/metal<br>(mol/mol) |
|--------------------------------------------------------------------|------|--------------------------------------------------|-----------------------|------------------------|---------------------------------|-------------------------|
|                                                                    |      | 250 ppmw <sub>S</sub>                            | 500 ppmw <sub>S</sub> | 1000 ppmw <sub>S</sub> |                                 |                         |
| MOF-5@<br>$\gamma$ -Al <sub>2</sub> O <sub>3</sub><br>(MOF-5)      | 20   | 3.21 (2.89)                                      | 3.49 (2.97)           | 3.58 (3.05)            | 29.76 (21.82)                   | 0.18 (0.13)             |
|                                                                    | 30   | 3.31 (2.94)                                      | 3.54 (3.11)           | 3.62 (3.37)            | 32.65 (24.73)                   | 0.19 (0.15)             |
|                                                                    | 40   | 3.41 (3.19)                                      | 3.60 (3.39)           | 3.91 (3.59)            | 28.44 (19.01)                   | 0.17 (0.11)             |
|                                                                    | 50   | 3.57 (3.31)                                      | 3.76 (3.57)           | 3.99 (3.64)            | 25.24 (16.91)                   | 0.15 (0.11)             |
| IRMOF-3<br>@ $\gamma$ -Al <sub>2</sub> O <sub>3</sub><br>(IRMOF-3) | 20   | 3.97 (3.57)                                      | 4.16 (3.89)           | 4.56 (4.17)            | 35.99 (27.89)                   | 0.23 (0.17)             |
|                                                                    | 30   | 4.26 (3.87)                                      | 4.62 (4.21)           | 5.09 (4.77)            | 39.15 (31.26)                   | 0.25 (0.19)             |
|                                                                    | 40   | 4.33 (4.02)                                      | 4.77 (4.42)           | 5.19 (4.96)            | 34.09 (26.13)                   | 0.21 (0.16)             |
|                                                                    | 50   | 4.93 (4.26)                                      | 5.08 (4.73)           | 5.43 (5.29)            | 29.94 (21.31)                   | 0.19 (0.14)             |

**Table S5.** The pseudo-second-order kinetic constants ( $k_2$ ) of MOF-5, MOF-5@ $\gamma$ -Al<sub>2</sub>O<sub>3</sub> and IRMOF-3, IRMOF-3@ $\gamma$ -Al<sub>2</sub>O<sub>3</sub> at various 4,6-DMDBT concentrations and different temperatures. The maximum adsorption capacities ( $Q_0$ ) and the molar ratios of 4,6-DMDBT that adsorbed on each metal ion are also presented.

| Adsorbent                                                     | T/°C | $k_2/10^{-3} \text{ g min}^{-1} \text{ mg}^{-1}$ |                       |                        | $Q_0/\text{mg S g}^{-1}$<br>MOF | 4,6-<br>DMDBT/met<br>al (mol/mol) |
|---------------------------------------------------------------|------|--------------------------------------------------|-----------------------|------------------------|---------------------------------|-----------------------------------|
|                                                               |      | 250 ppmw <sub>S</sub>                            | 500 ppmw <sub>S</sub> | 1000 ppmw <sub>S</sub> |                                 |                                   |
| MOF-5@<br>$\gamma$ -Al <sub>2</sub> O <sub>3</sub><br>(MOF-5) | 20   | 4.07 (3.45)                                      | 4.32 (3.83)           | 4.56 (4.14)            | 18.84 (11.21)                   | 0.11 (0.07)                       |
|                                                               | 30   | 4.44 (4.11)                                      | 4.87 (4.42)           | 5.07 (4.74)            | 20.21 (12.81)                   | 0.12 (0.08)                       |
|                                                               | 40   | 4.75 (4.28)                                      | 5.24 (4.56)           | 5.54 (5.01)            | 17.65 (10.84)                   | 0.11 (0.06)                       |



|                                                                                   |           |             |             |             |               |             |
|-----------------------------------------------------------------------------------|-----------|-------------|-------------|-------------|---------------|-------------|
|                                                                                   | <b>50</b> | 5.17 (4.79) | 5.45 (5.17) | 5.63 (5.32) | 15.39 (9.18)  | 0.09 (0.05) |
| <b>IRMOF-3<br/>@<math>\gamma</math>-Al<sub>2</sub>O<sub>3</sub><br/>(IRMOF-3)</b> | <b>20</b> | 4.45 (4.18) | 4.87 (4.58) | 5.06 (4.83) | 24.79 (16.48) | 0.16 (0.11) |
|                                                                                   | <b>30</b> | 4.56 (4.44) | 5.01 (4.82) | 5.38 (5.15) | 27.01 (18.95) | 0.17 (0.12) |
|                                                                                   | <b>40</b> | 5.15 (4.75) | 5.32 (5.01) | 5.78 (5.31) | 24.16 (15.91) | 0.15 (0.10) |
|                                                                                   | <b>50</b> | 5.26 (4.91) | 5.59 (5.25) | 6.01 (5.78) | 21.46 (12.87) | 0.13 (0.08) |

## 7. Thermodynamic analysis

Adsorption isotherm was simulated by Langmuir adsorption isothermal model with the Langmuir equation as follows:<sup>[34,36]</sup>

$$\frac{C_e}{q_e} = \frac{C_e}{Q_0} + \frac{1}{Q_0 b} \quad (3)$$

where  $C_e$  is equilibrium concentration of the sulfur in model oil (mg/L),  $q_e$  is equilibrium adsorption capacity (mg S/g MOF),  $Q_0$  is saturated adsorption capacity (mg S/g MOF),  $b$  is Langmuir constant(L/mg).  $Q_0$  and  $b$  were deduced by plotting  $C_e$  versus  $C_e/q_e$ .

To shed light on the thermodynamics of adsorption process, we calculated the Gibbs free energy change ( $\Delta G$ ), enthalpy change ( $\Delta H$ ) and entropy change ( $\Delta S$ ) based on the Gibbs and Van't Hoff equations:<sup>[37]</sup>

$$\Delta G = -RT \ln b \quad (4)$$

$$\ln b = \frac{\Delta S}{R} - \frac{\Delta H}{RT} \quad (5)$$

where  $b$  is Langmuir constant (L/mol), and enthalpy change ( $\Delta H$ ) and entropy change ( $\Delta S$ ) were determined by plotting  $\ln b$  versus  $1/T$ .

### 7.1 Adsorption isotherms of BT over the MOFs

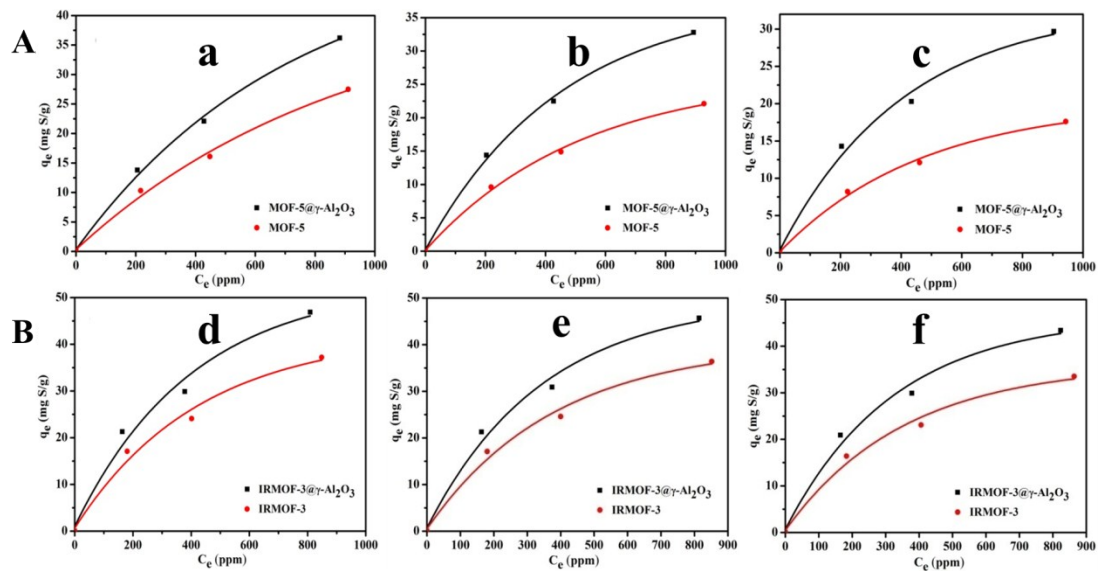

**Fig. S9** Adsorption isotherms of BT over MOF-5 and MOF-5@ $\gamma$ -Al<sub>2</sub>O<sub>3</sub> (A), IRMOF-3 and IRMOF-3@ $\gamma$ -Al<sub>2</sub>O<sub>3</sub> (B) at 20 °C (a, d), 40 °C (b, e) and 50 °C (c, f).

### 7.2 The Langmuir fitting curves for SCCs over the adsorbents

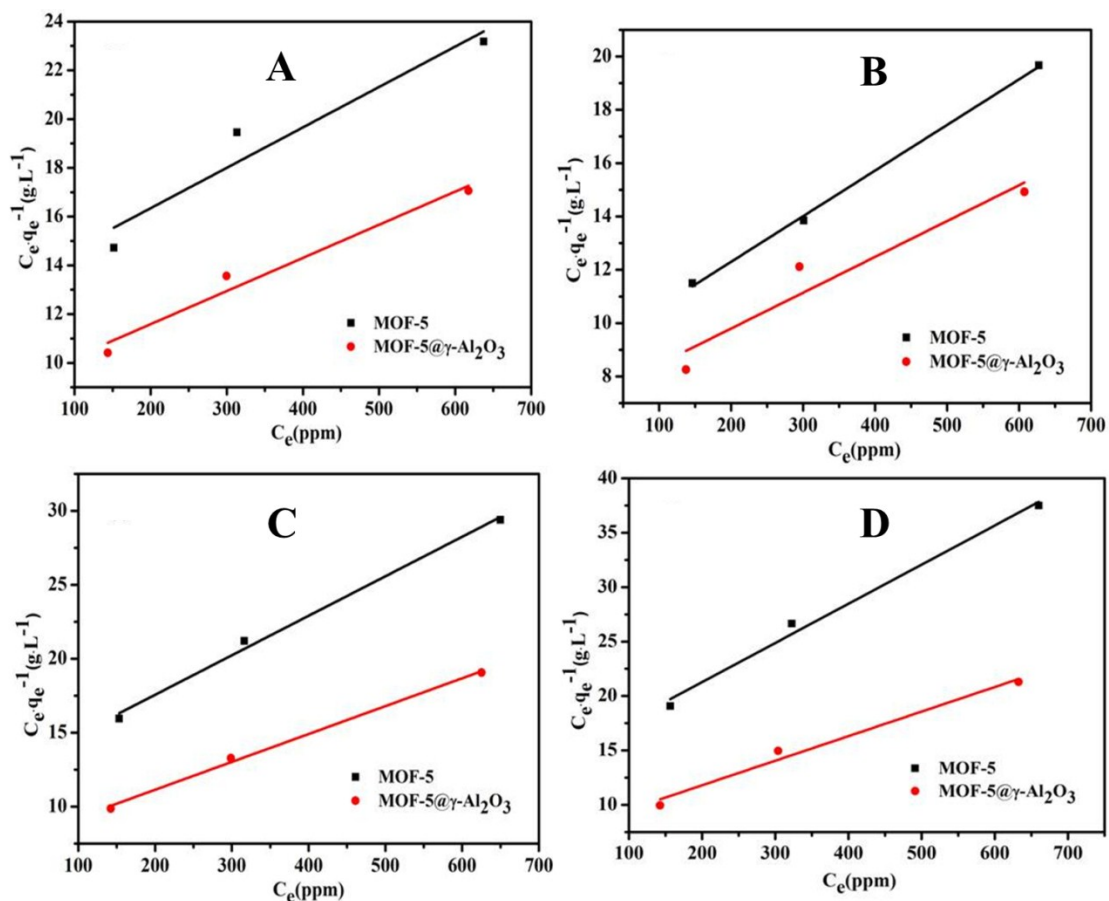

**Fig. S10** Langmuir fitting curves for BT over MOF-5 and MOF-5@ $\gamma$ -Al<sub>2</sub>O<sub>3</sub> at 20 °C (A), 30 °C (B), 40 °C (C) and 50 °C (D).

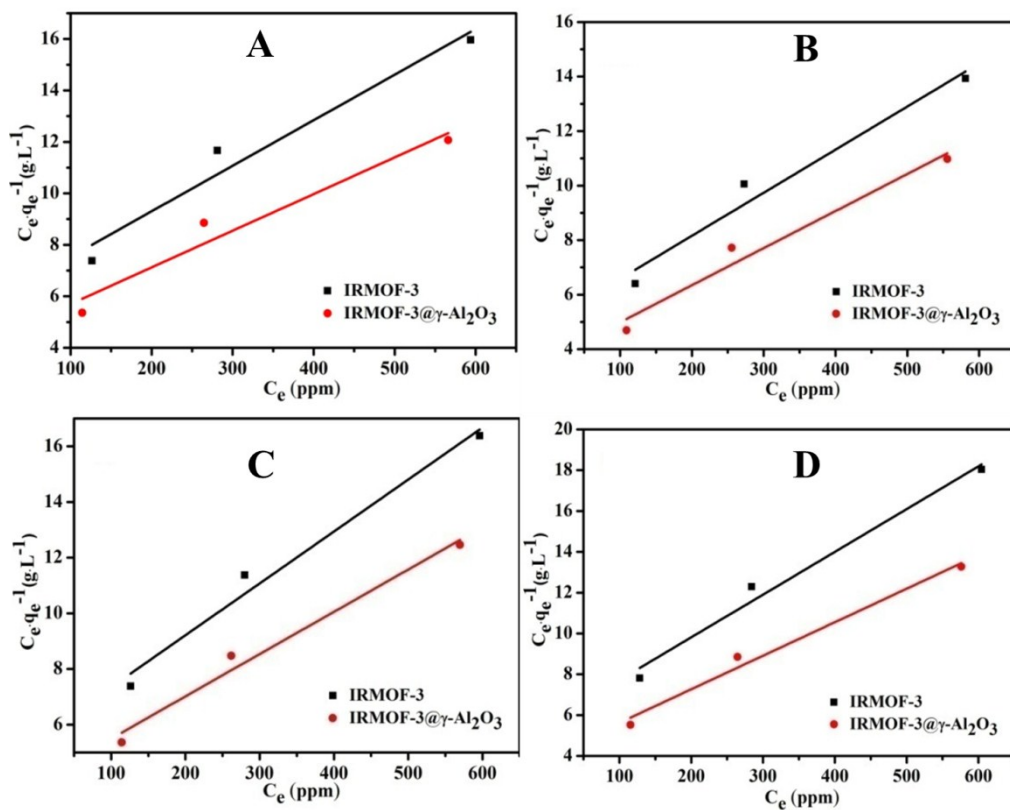

**Fig. S11** Langmuir fitting curves for BT over IRMOF-3 and IRMOF-3@ $\gamma$ -Al<sub>2</sub>O<sub>3</sub> at 20 °C (A), 30 °C (B), 40 °C (C) and 50 °C (D).

**7.3 . Plots of  $\ln b$  versus  $1/T$  for the adsorbents**

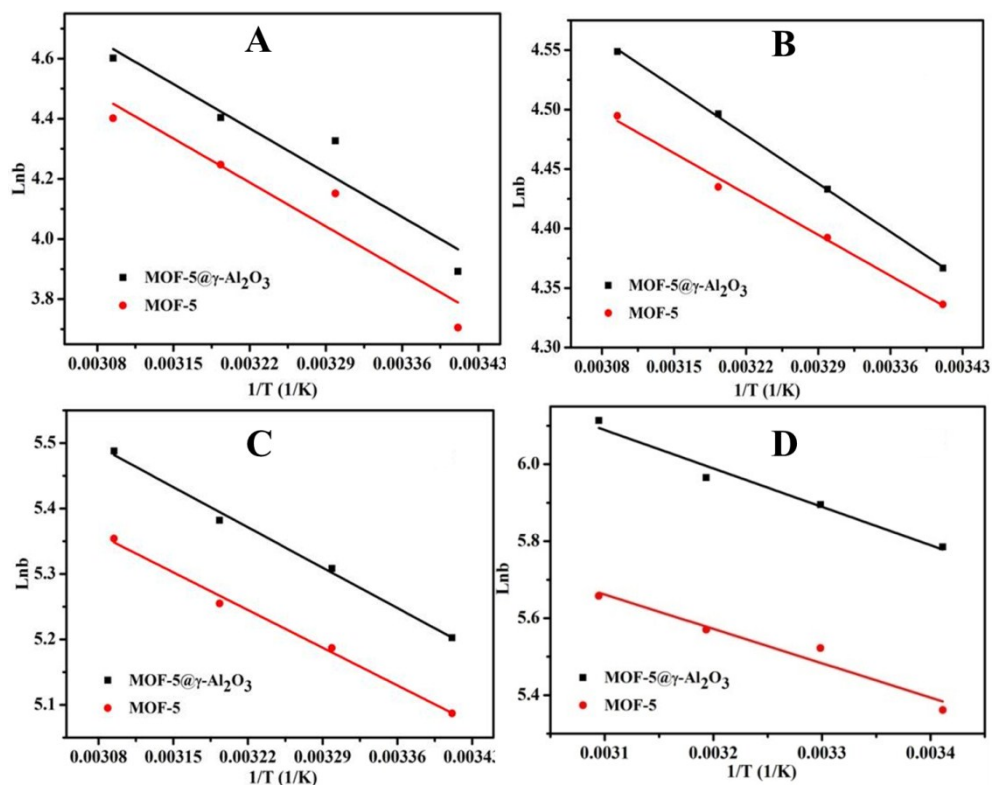

**Fig. S12** Plots of  $\ln b$  versus  $1/T$  of MOF-5 and MOF-5@ $\gamma$ -Al<sub>2</sub>O<sub>3</sub>: BT (A), DBT (B), 3-MT (C), 4,6-DMDBT (D).

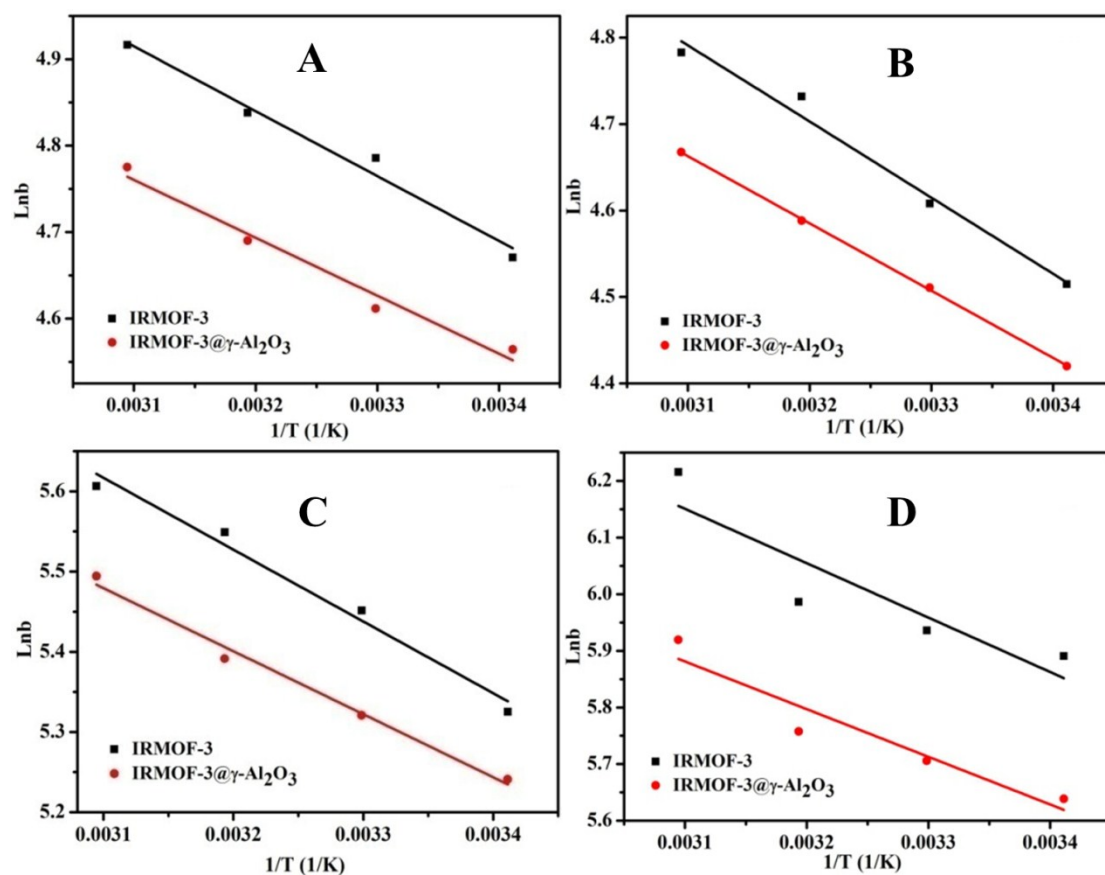

**Fig. S13** Plots of  $\ln b$  versus  $1/T$  of IRMOF-3 and IRMOF-3@ $\gamma$ -Al<sub>2</sub>O<sub>3</sub>: BT (A), DBT (B), 3-MT (C), 4,6-DMDBT (D).

**Table S6.** The thermodynamic parameters of DBT adsorption over MOF-5@ $\gamma$ -Al<sub>2</sub>O<sub>3</sub> and IRMOF-3@ $\gamma$ -Al<sub>2</sub>O<sub>3</sub> at different temperatures.

| Adsorbent                                                   | T/°C | $\Delta G/$ kJ mol <sup>-1</sup> | $\Delta H/$ kJ mol <sup>-1</sup> | $\Delta S/$ J mol <sup>-1</sup> K <sup>-1</sup> |
|-------------------------------------------------------------|------|----------------------------------|----------------------------------|-------------------------------------------------|
| MOF-5@ $\gamma$ -Al <sub>2</sub> O <sub>3</sub> (MOF-5)     | 20   | -10.64 (-10.57)                  | 4.81 (4.08)                      | 52.72 (49.96)                                   |
|                                                             | 30   | -11.17 (-11.07)                  |                                  |                                                 |
|                                                             | 40   | -11.71 (-11.54)                  |                                  |                                                 |
|                                                             | 50   | -12.21 (-12.08)                  |                                  |                                                 |
|                                                             | 20   | -11.37 (-10.85)                  |                                  |                                                 |
| IRMOF-3@ $\gamma$ -Al <sub>2</sub> O <sub>3</sub> (IRMOF-3) | 30   | -11.84 (-11.44)                  | 7.44 (6.53)                      | 69.76 (65.81)                                   |
|                                                             | 40   | -12.32 (-11.95)                  |                                  |                                                 |
|                                                             | 50   | -12.85 (-12.54)                  |                                  |                                                 |

**Table S7.** The thermodynamic parameters of 3-MT adsorption over MOF-5@ $\gamma$ -Al<sub>2</sub>O<sub>3</sub> and IRMOF-3@ $\gamma$ -Al<sub>2</sub>O<sub>3</sub> at different temperatures.

| Adsorbent | T/°C | $\Delta G/$ kJ mol <sup>-1</sup> | $\Delta H/$ kJ mol <sup>-1</sup> | $\Delta S/$ J mol <sup>-1</sup> K <sup>-1</sup> |
|-----------|------|----------------------------------|----------------------------------|-------------------------------------------------|
|-----------|------|----------------------------------|----------------------------------|-------------------------------------------------|

|                                                                          |    |                 |             |               |
|--------------------------------------------------------------------------|----|-----------------|-------------|---------------|
| <b>MOF-5@<math>\gamma</math>-Al<sub>2</sub>O<sub>3</sub> (MOF-5)</b>     | 20 | -12.68 (-12.39) | 6.57 (6.06) | 67.04 (64.26) |
|                                                                          | 30 | -13.37 (-13.06) |             |               |
|                                                                          | 40 | -14.01 (-13.68) |             |               |
|                                                                          | 50 | -14.74 (-14.38) |             |               |
| <b>IRMOF-3@<math>\gamma</math>-Al<sub>2</sub>O<sub>3</sub> (IRMOF-3)</b> | 20 | -12.98 (-12.77) | 7.32 (6.84) | 68.23 (65.64) |
|                                                                          | 30 | -13.74 (-13.41) |             |               |
|                                                                          | 40 | -14.45 (-14.04) |             |               |
|                                                                          | 50 | -15.06 (-14.76) |             |               |

**Table S8.** The thermodynamic parameters of 4,6-DMDBT adsorption over MOF-5@ $\gamma$ -Al<sub>2</sub>O<sub>3</sub> and IRMOF-3@ $\gamma$ -Al<sub>2</sub>O<sub>3</sub> at different temperatures.

| Adsorbent                                                               | T/°C | $\Delta G$ /kJ mol <sup>-1</sup> | $\Delta H$ /kJ mol <sup>-1</sup> | $\Delta S$ /J mol <sup>-1</sup> K <sup>-1</sup> |
|-------------------------------------------------------------------------|------|----------------------------------|----------------------------------|-------------------------------------------------|
| <b>MOF-5@<math>\gamma</math>-Al<sub>2</sub>O<sub>3</sub> (MOF-5)</b>    | 20   | -14.11 (-13.07)                  | 7.98 (6.99)                      | 75.89 (70.06)                                   |
|                                                                         | 30   | -14.86 (-13.92)                  |                                  |                                                 |
|                                                                         | 40   | -15.53 (-14.51)                  |                                  |                                                 |
|                                                                         | 50   | -16.43 (-15.20)                  |                                  |                                                 |
| <b>IRMOF-3@<math>\gamma</math>-Al<sub>2</sub>O<sub>3</sub>(IRMOF-3)</b> | 20   | -14.36 (-13.74)                  | 8.29 (7.41)                      | 76.33 (70.58)                                   |
|                                                                         | 30   | -15.31 (14.38)                   |                                  |                                                 |
|                                                                         | 40   | -15.59 (-14.83)                  |                                  |                                                 |
|                                                                         | 50   | -15.86 (-15.41)                  |                                  |                                                 |

### References

- S1. J. Hafizovic, M. Bjørgen, U. Olsbye, P. D. C. Dietzel, S. Bordiga, C. Prestipino, C. Lamberti and K. P. Lillerud, *J. Am. Chem. Soc.*, 2007, 129, 3612-3620.
- S2. X.-L. Wang, H.-L. Fan, Z. Tian, E.-Y. He, Y. Li and J. Shangguan, *Appl. Surf. Sci.*, 2014, 289, 107-113.
- S3. Y. S. Ho and G. McKay, *Process Biochem.*, 1999, 34, 451-465.
- S4. B. H. Hameed and A. A. Rahman, *J. Hazard. Mater.*, 2008, 160, 576-581.
